# Supplementary material for: Use of gene expression studies to investigate the human immunological response to malaria infection
Source: PubMed Central journal article supplement (PMC6911278; doi:10.1186/s12936-019-3035-0), 2019-12-13
Supplement: 12936_2019_3035_MOESM1_ESM.pdf [file 12936_2019_3035_MOESM1_ESM.pdf]

**30 GEO Datasets  
Identified**

**7 Datasets excluded**  
No published analyses

**23 Datasets included**

**25 Publications analysed**

- One publication per dataset: n= 20
- $\geq 2$  publications per dataset : n= 3
- 1 publication for  $\geq 2$  datasets: n=3
